# Supplementary material for: Characterization of the In Vitro and In Vivo Efficacy of Baloxavir Marboxil against the H5 Highly Pathogenic Avian Influenza Virus Infection
Source: Preprints.org preprint supplement (doi:10.20944/preprints202111.0184.v1), 2021-11-09
Supplement: Supplementary file 1 [file supplementary]

**Supplementary data**

**Table S1.** Summary of variants of the PA or NA region in viral RNAs derived from lung homogenates

1. Breakdown of sample analysis

| **Administration** | **Days post infection** | | | | | | | |
| --- | --- | --- | --- | --- | --- | --- | --- | --- |
| **3** | | **5** | | **6** | | **7** | |
| **Protein** | | | | | | | |
| **PA** | **NA** | **PA** | **NA** | **PA** | **NA** | **PA** | **NA** |
| OSP, 10 mg/kg/dose | 2/5* | 0/5 | 0/5 | 0/5 | 0/5 | 0/5 | 0/3# | 0/3# |
| BXM, 5 mg/kg/dose | 0/5 | 0/5 | 0/5 | 0/5 | 0/5 | 0/5 | 0/5 | 0/5 |
| BXM, 50 mg/kg/dose | 0/5 | 0/5 | 0/5 | 0/5 | 0/5 | 0/5 | 0/5 | 0/5 |
| BXM, 5 mg/kg/dose | 0/5 | 0/5 | 0/5 | 0/5 | 0/5 | 0/5 | 0/5 | 0/5 |
| BXM 5 mg/kg/dose + OSP 10 mg/kg/dose | 0/5 | 0/5 | 0/5 | 0/5 | 0/5 | 0/5 | 0/5 | 0/5 |

* Each value represents the number of samples harboring amino acid changes per number of samples analyzed.

#, n = 3/group.

1. Differences in amino acid positions of the PA region in samples treated with OSP, 10 mg/kg/dose

| #1* | T20A | I38F | I61T | V63I | A85T |
| --- | --- | --- | --- | --- | --- |
|  | V100A/V | D101D/E | T118I | I127V | K237E |
|  | K262R | D272N | R318K | M336M/L | A337A/V |
|  | D352D/E | K356K/R | I387V | D388N | H394N |
|  | L400P | S405C | S409N | I423V | K442R |
|  | I467T | E547D | I554V | A560P | D580E |
|  | I602V | M607L | R615K | S651A | G688E |
| #2 | I38T | K442R | I467T |  |  |

* The amino acid sequence positions at 360 to 367 were undetermined.

**
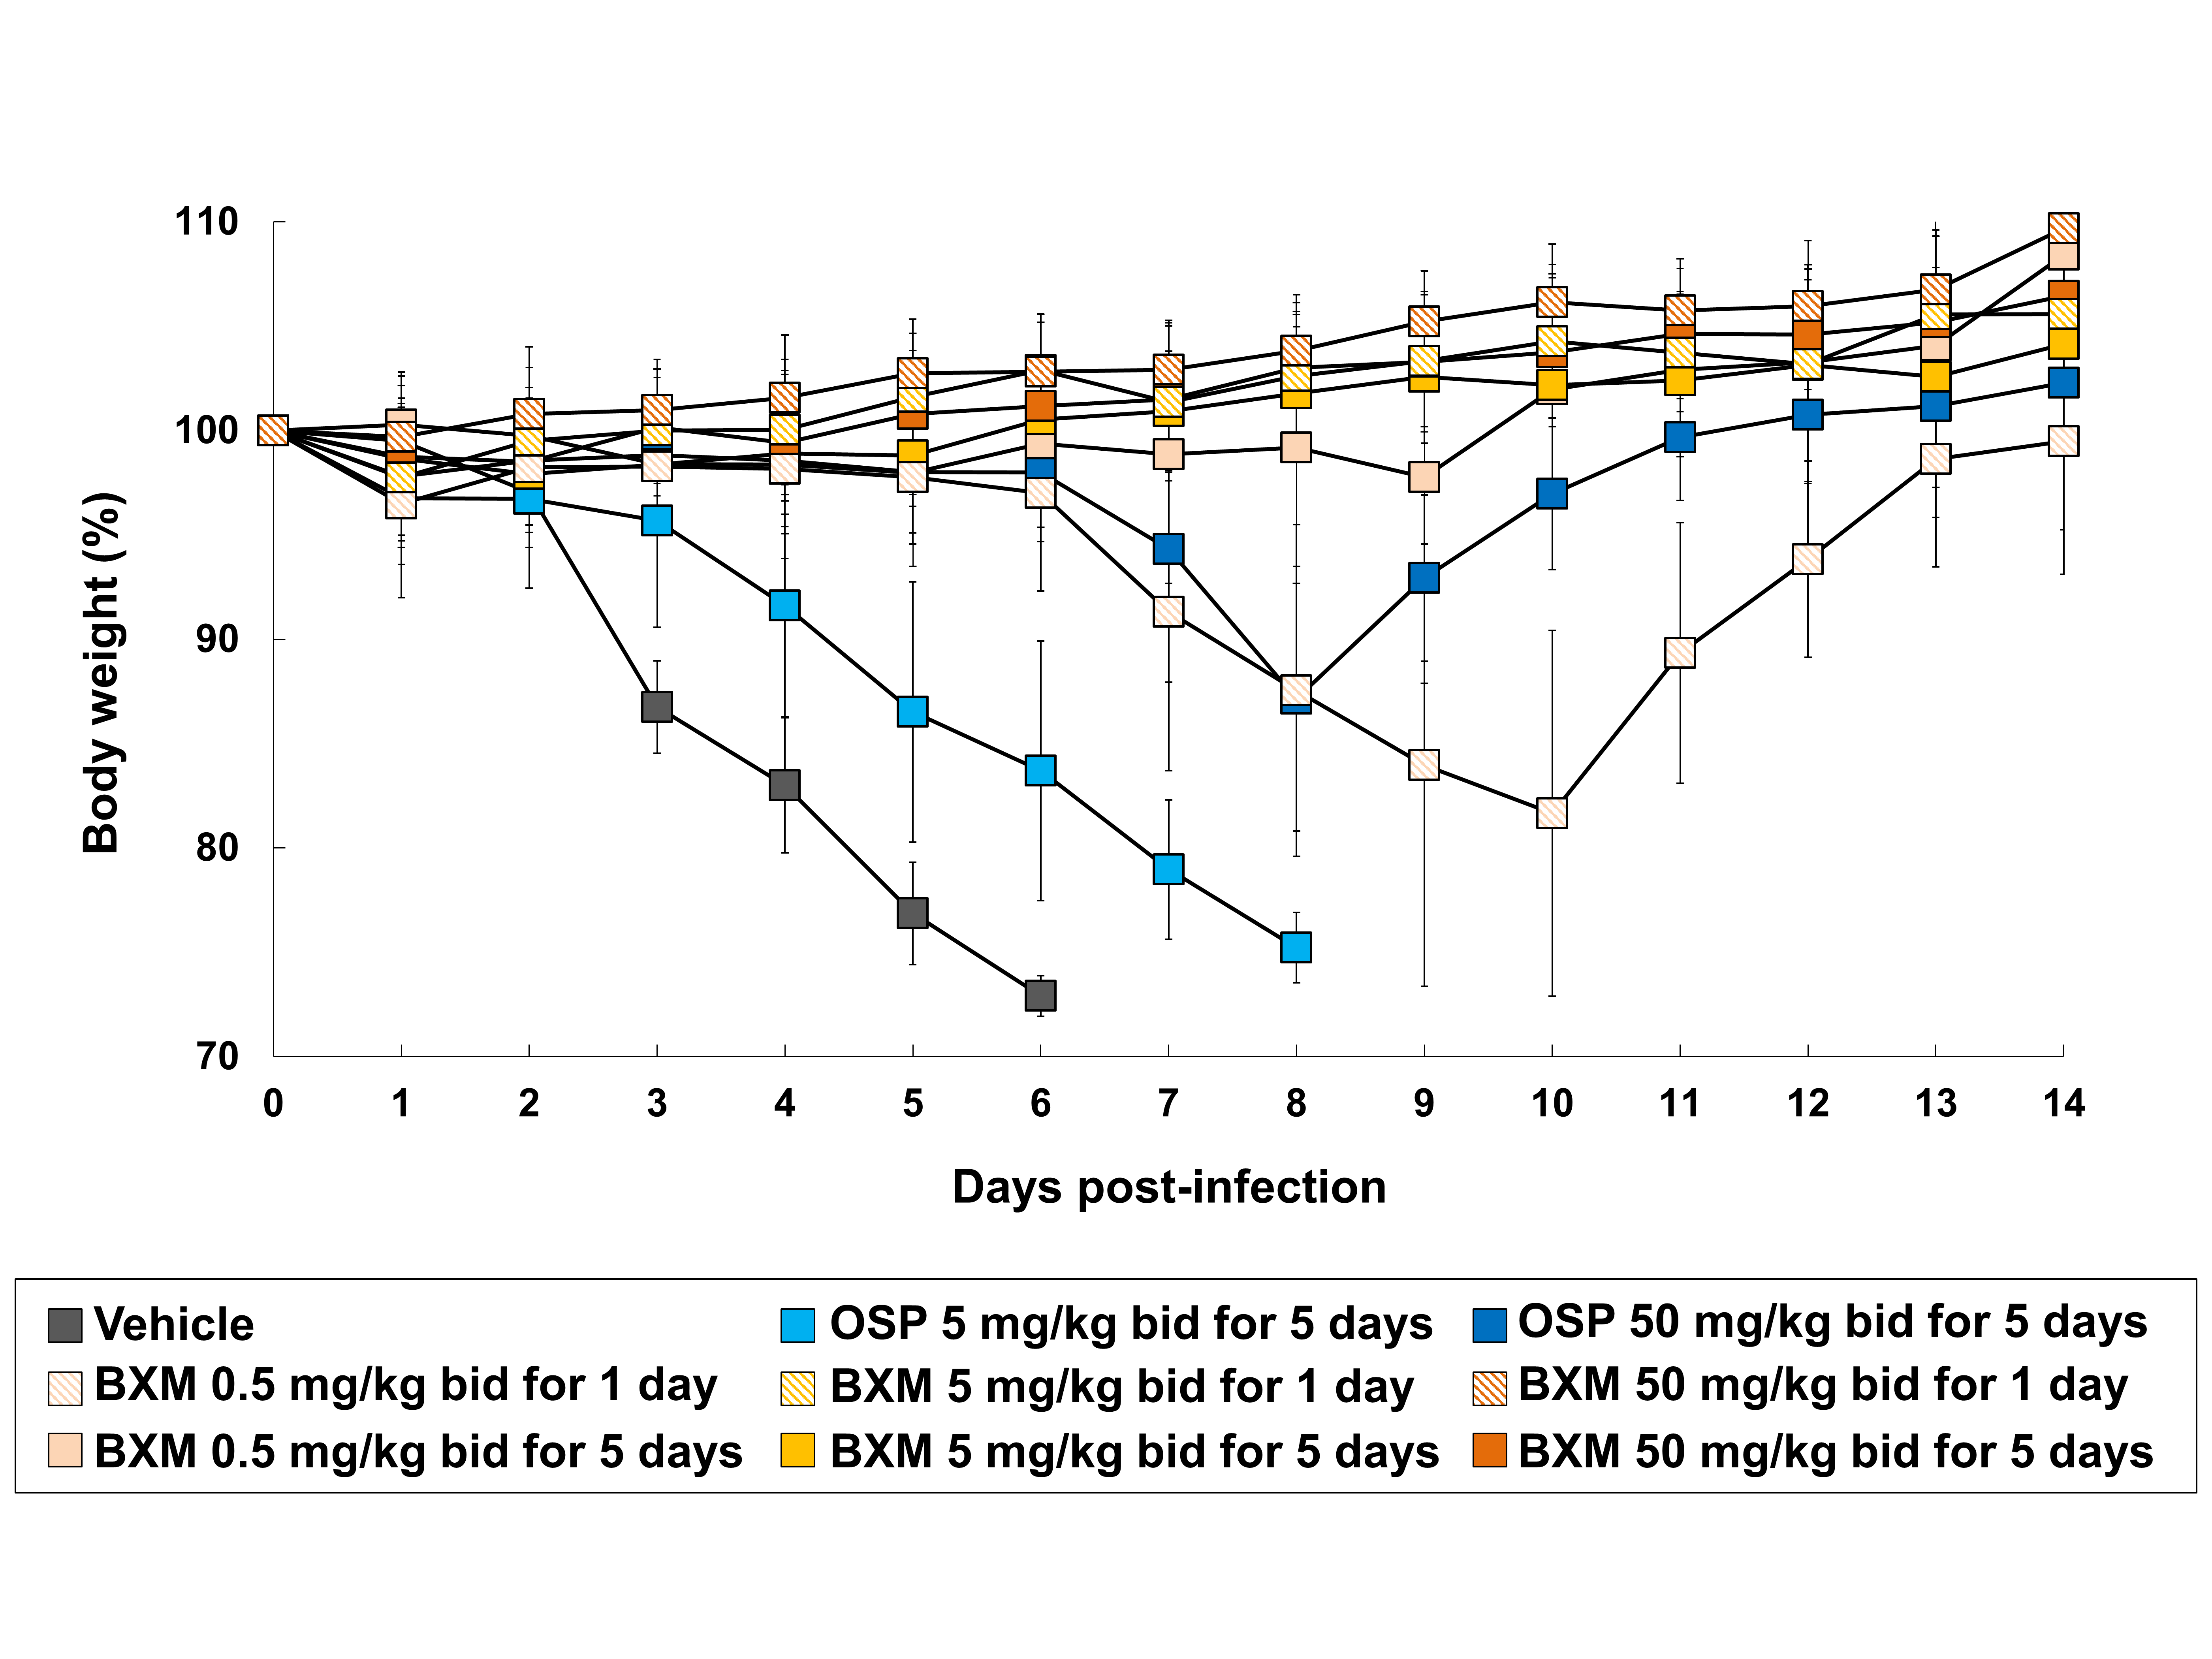
**

**Figure S1.** Therapeutic effects of BXM on body weight loss in a lethal infection mouse model with H5N1 HPAIV

Body weight changes were monitored through a 14-day period after infection. Details of mouse experiments are shown in the legend of Fig. 1.


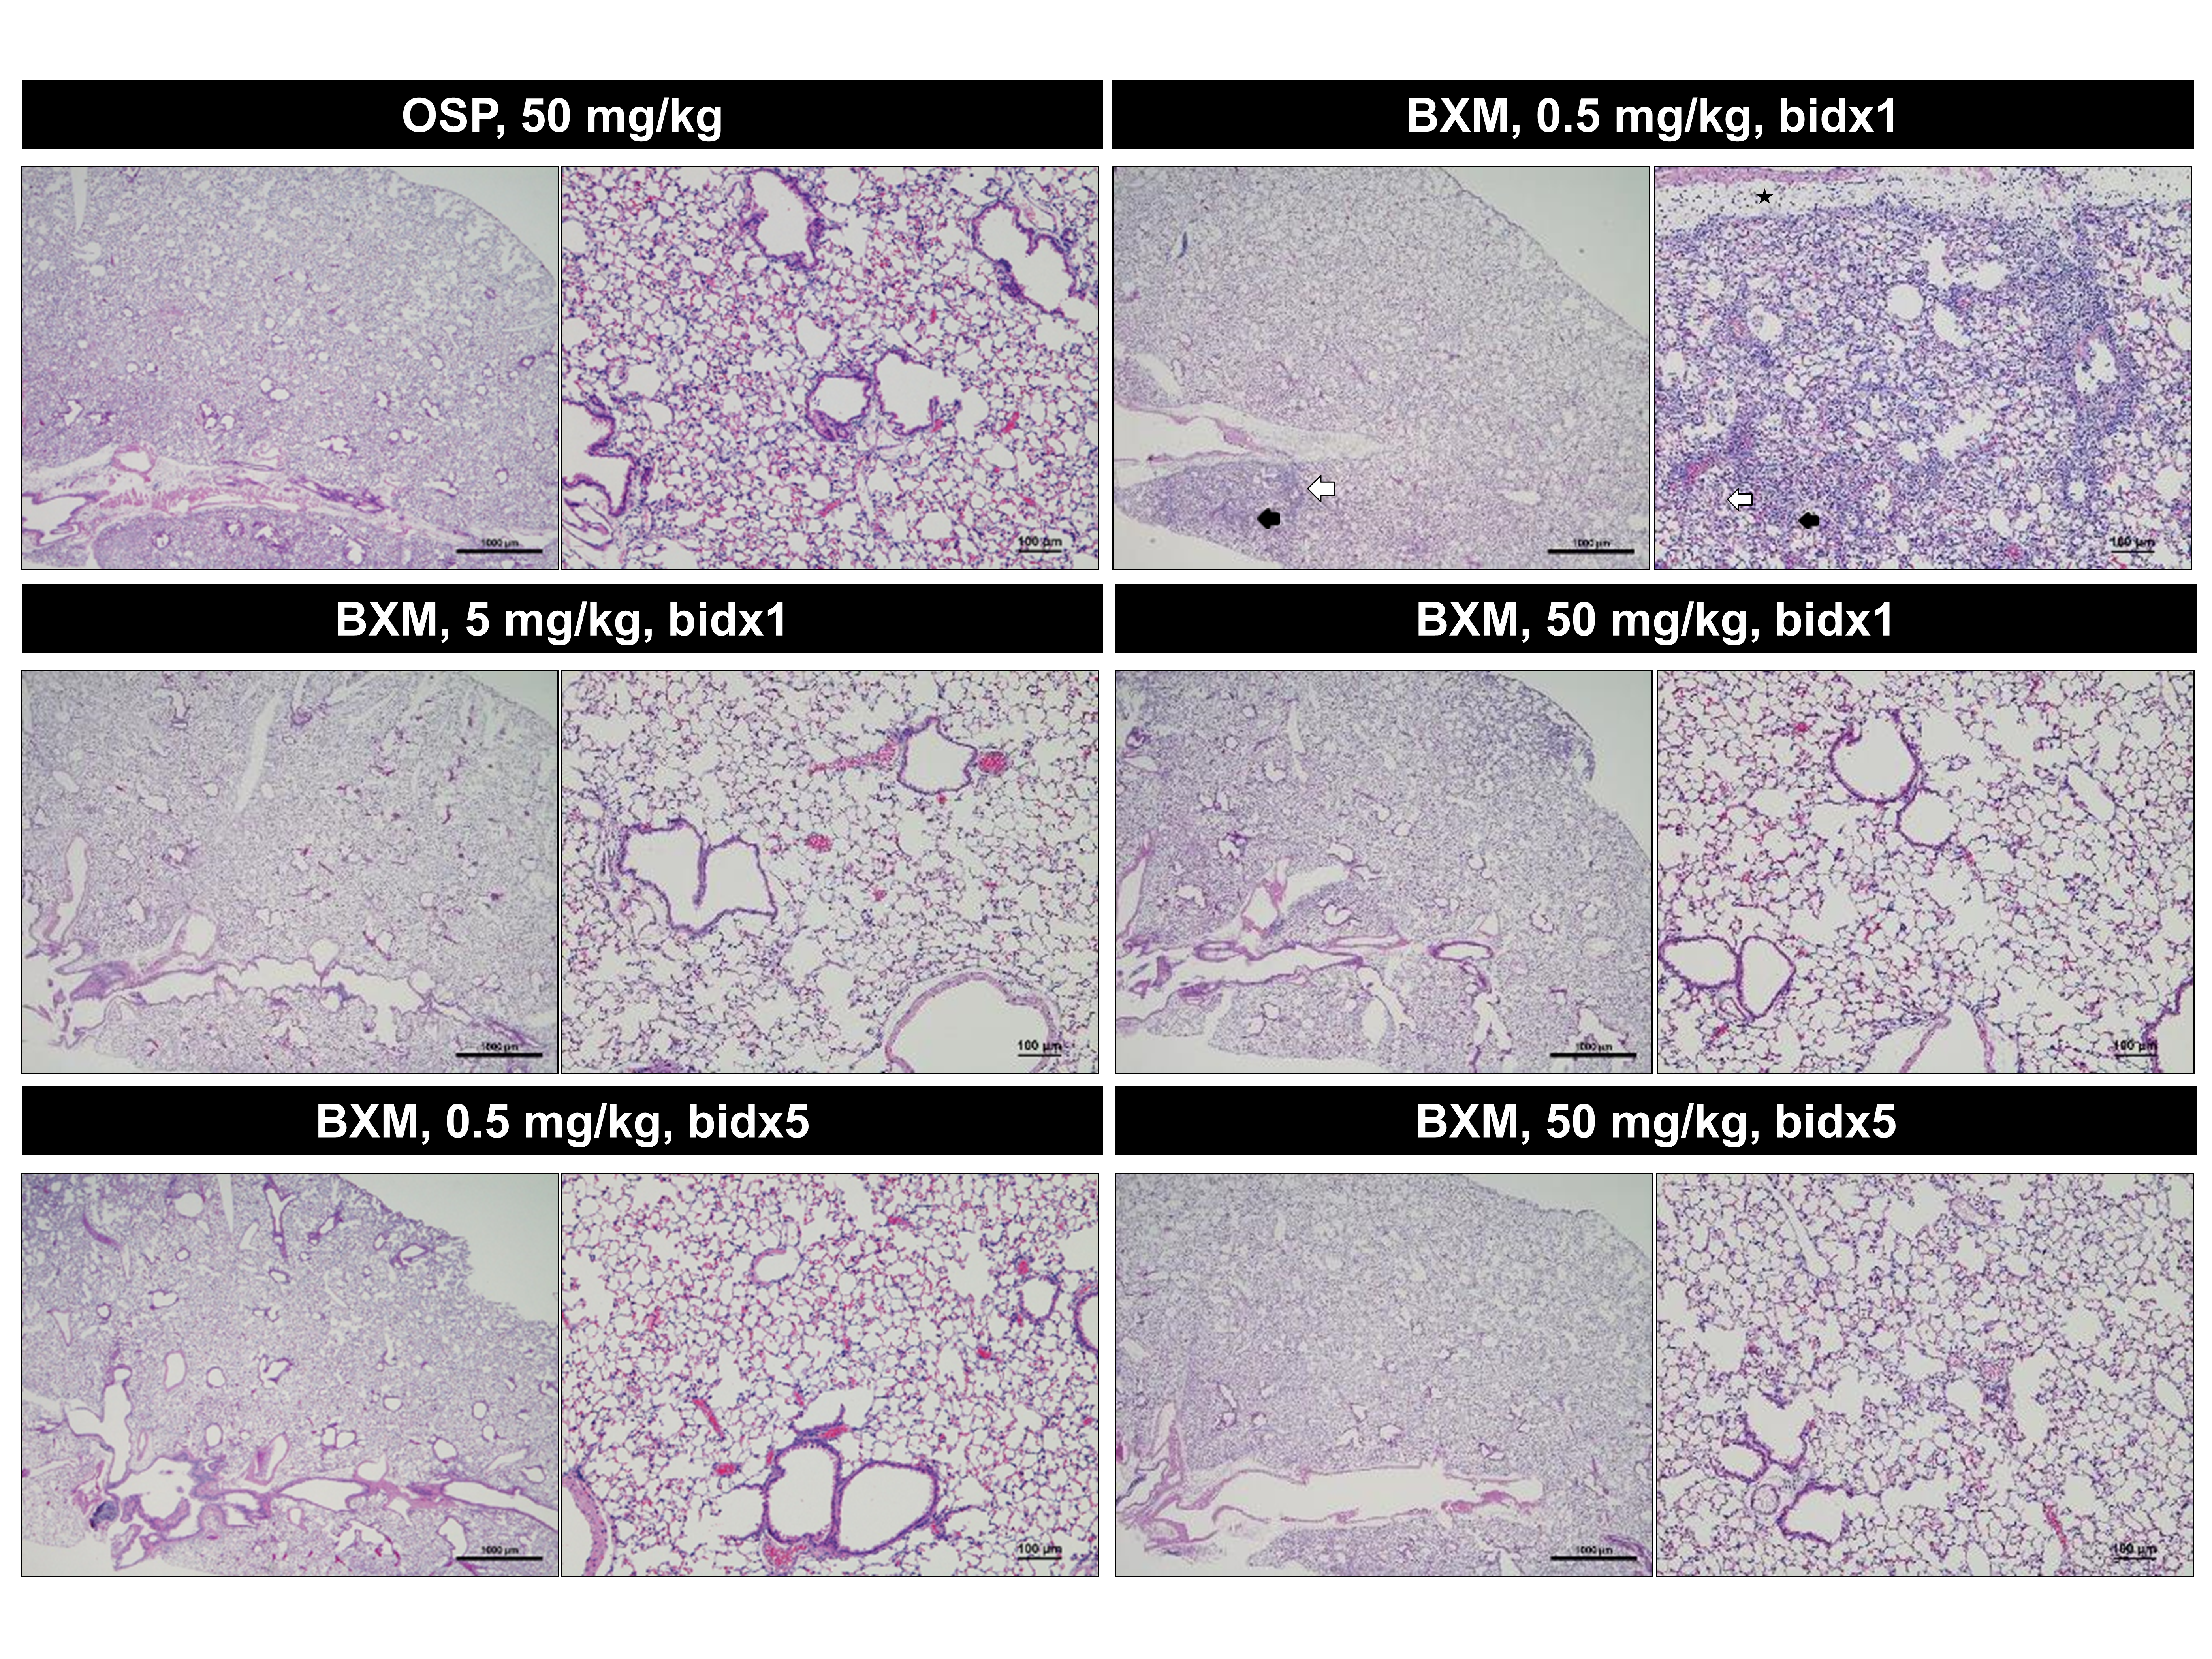


**Figure S2.** Histopathological findings from mice lungs following BXM treatment

Details of mouse experiments are shown in the legend of Fig. 3B. Left panels of each dosing showed wide-fields (2× magnification of objective), whereas right panels of each dosing showed narrow-fields (20× magnification of objective). Black arrows indicate thickening and inflammatory cell infiltration of alveolar walls. White arrows indicate inflammatory cell infiltration within the alveoli. Black stars indicate edema.


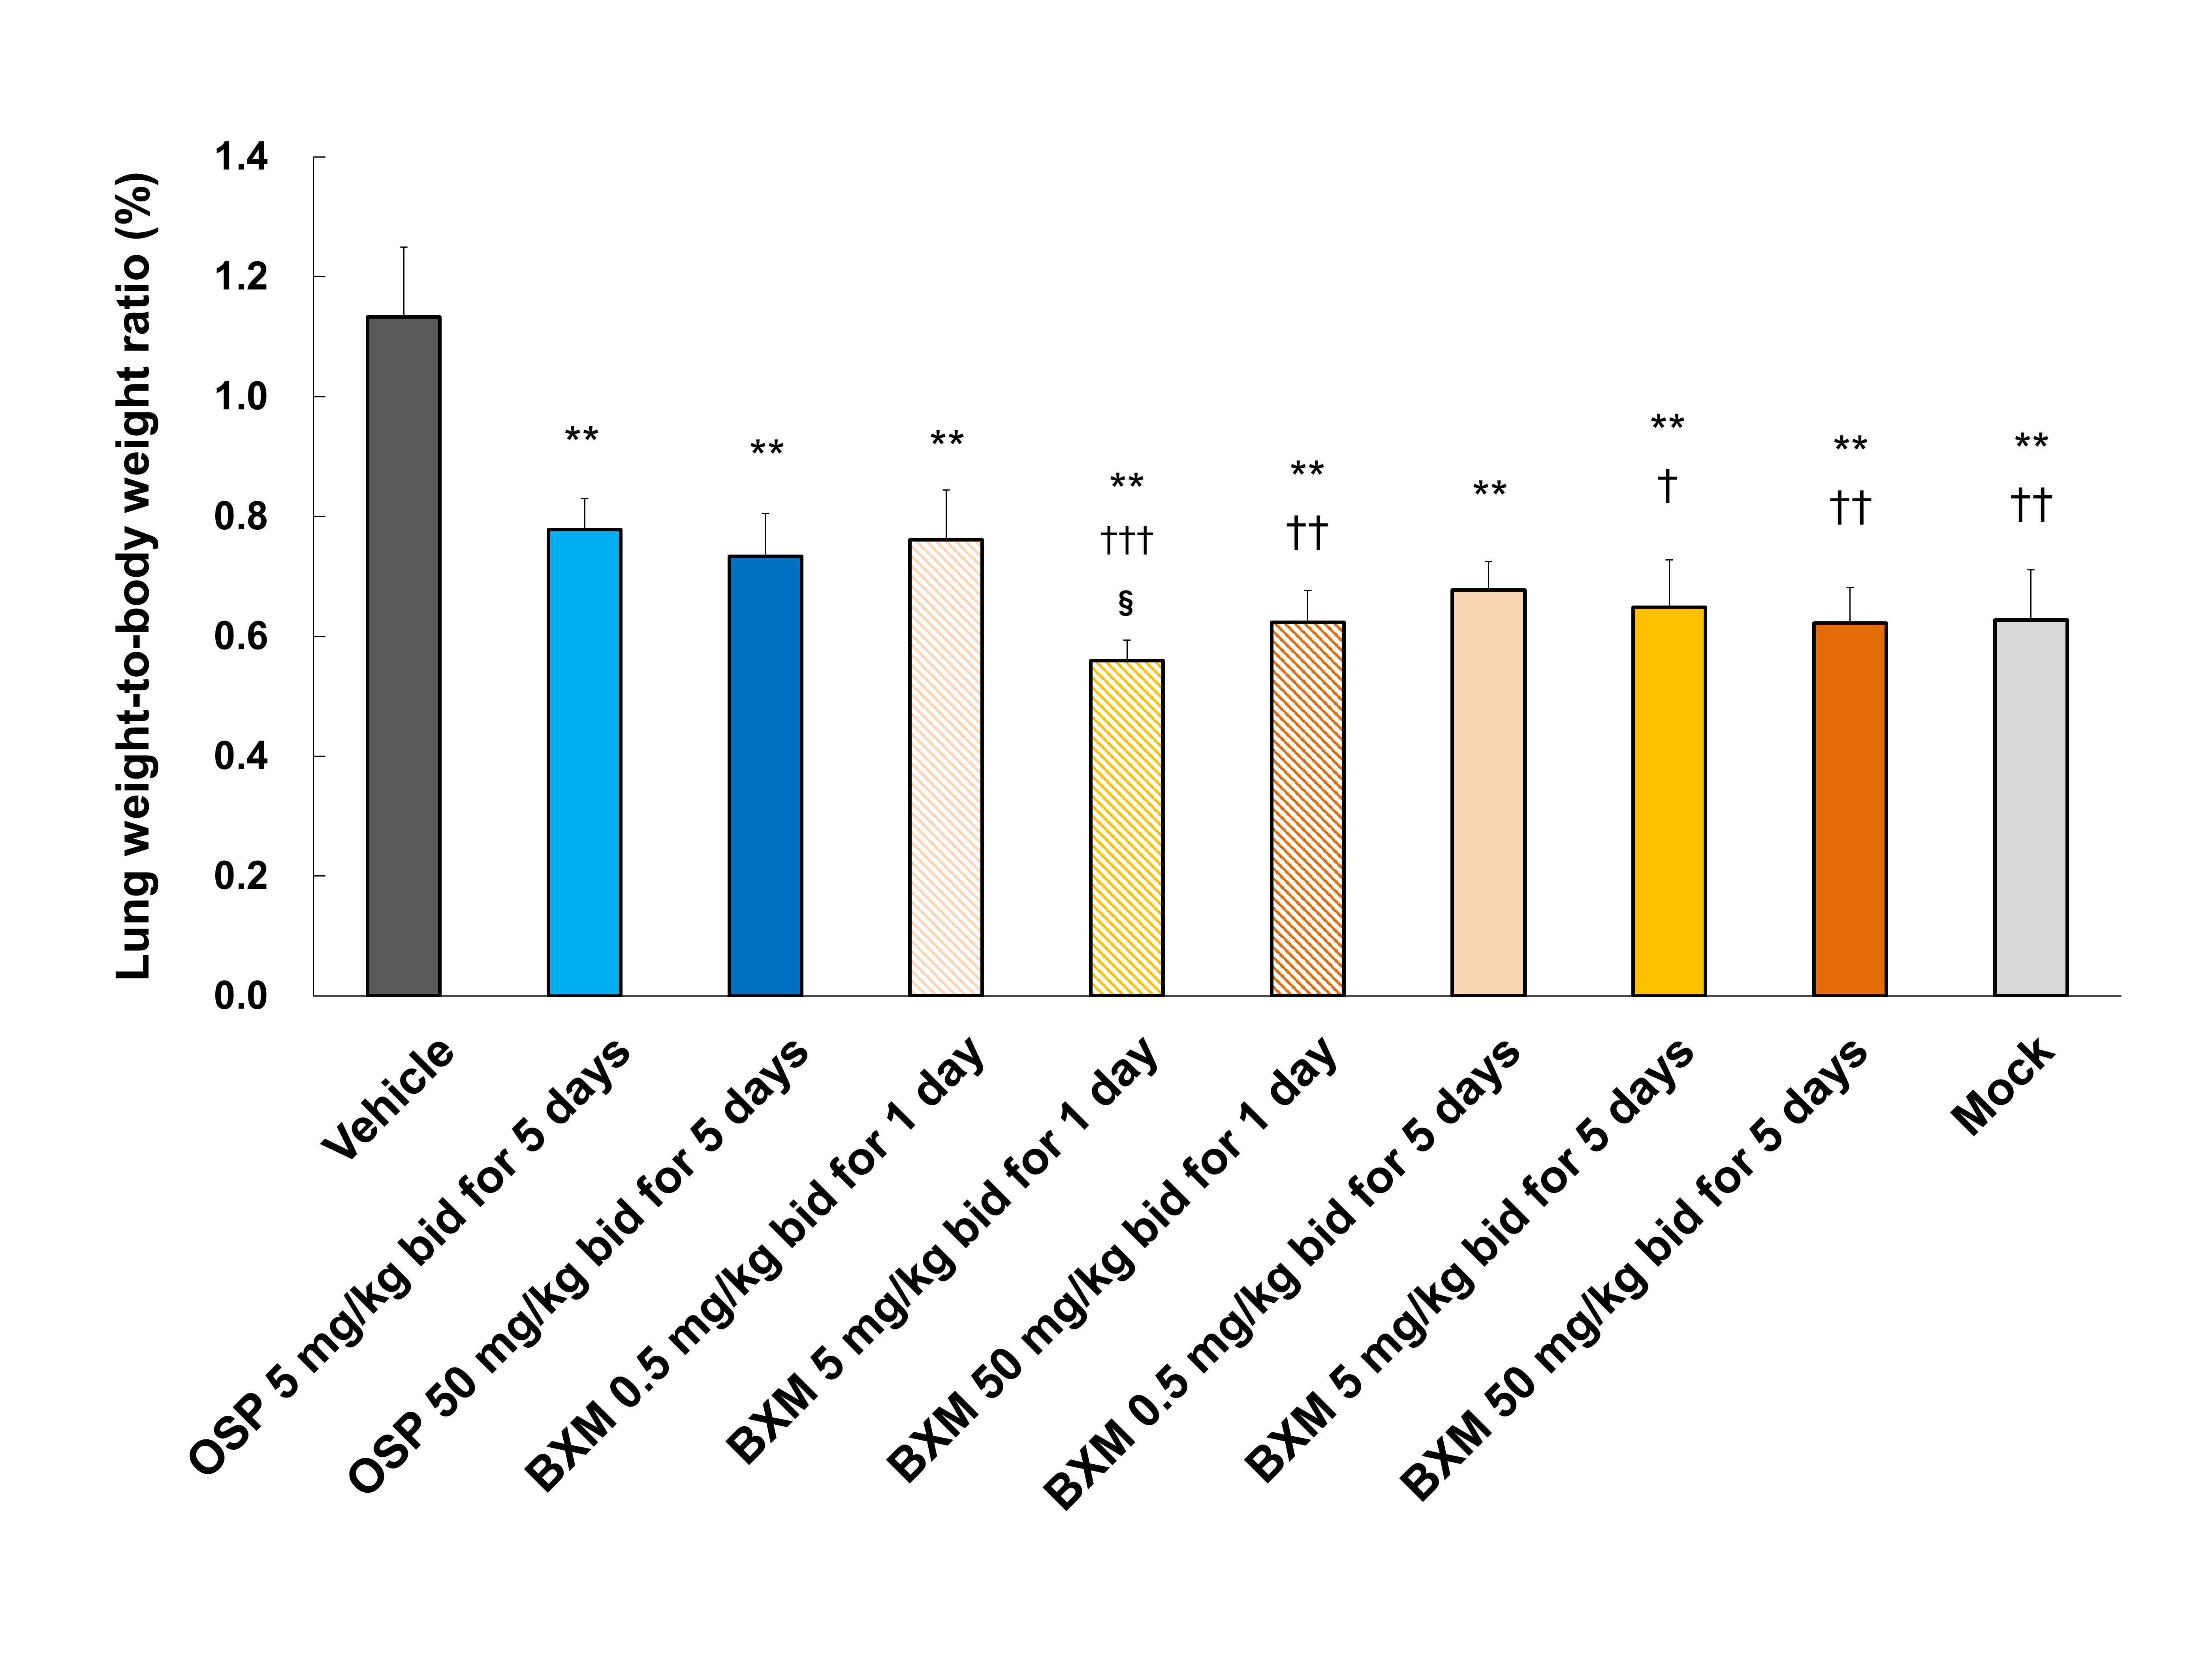


**Figure S3.** The prevention of lung indices in mice following BXM treatment

The body weights of mice were measured, after which whole lungs collected at 5 dpi were weighed. The lung wet weight-to-body weight ratio in each treatment group was then calculated as previously reported [44]. Dunnett's multiple-comparison method was employed for comparing the lung’s wet weight-to-body weight ratios between each group (** *p* < 0.001 compared to the vehicle. † *p* < 0.05, †† *p* < 0.01, ††† *p* < 0.001 compared to OSP at 5 mg/kg twice daily. § *p* < 0.05 compared to OSP at 50 mg/kg twice daily).
